# Supplementary material
Source: publisher figshare collection journal article supplement (https://acs.figshare.com/ndownloader/files/6501852)
Supplement: Supplementary file 1 [file 6501852]

# Supporting Information

## Dipole-Oriented Molecular Solids Can Undergo a Phase Change and Still Maintain Electrical Polarization

Andrew Cassidy\*[a], Mads R. V. Jørgensen, [b] Alexander Rosu-Finsen, [c] Jérôme Lasne, [c] Jakob H. Jørgensen, [a] Artur Glavic, [d, †] Valeria Lauter, [d] Bo B. Iversen, [b] Martin R.S. McCoustra, [c] and David Field.[a]

[a] A Cassidy\*, JH Jørgensen, D. Field, Department of Physics and Astronomy, Aarhus University, Ny Munkegade 120, Aarhus C, Denmark. E-mail:

[amc@phys.au.dk](mailto:amc@phys.au.dk). Telephone: +45 87155584.

[b] MRV Jørgensen, BB Iversen, Center of Materials Crystallography, iNano & Department of Chemistry, Aarhus University, Langelandsgade 140, Aarhus C, Denmark

[c] A Rosu-Finsen, J. Lasne, MRS McCoustra, Institute of Chemical Sciences, Heriot-Watt University, Riccarton, EH14 4AS Edinburgh, United Kingdom

[d] A Glavic†, V Lauter, Quantum Condensed Matter Division, Oak Ridge National Lab, Oak Ridge, TN 37831, USA.

\*Corresponding Author

† Present Address Artur Glavic, Laboratory for Neutron Scattering and Imaging, Paul Scherrer Institut, 5232 Villigen PSI, Switzerland.



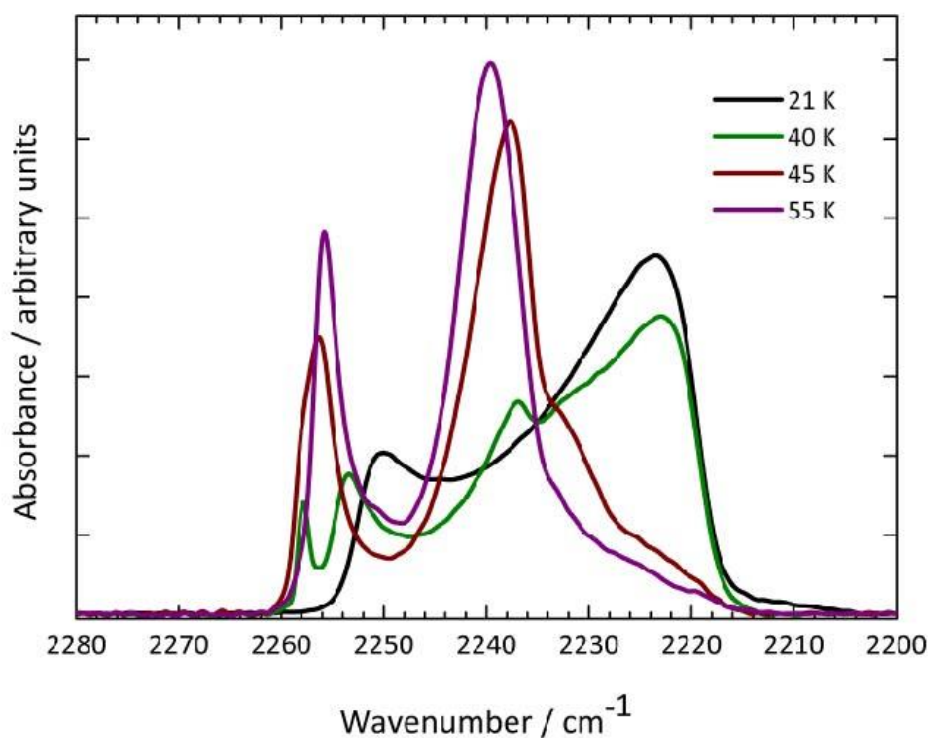

**SP - Figure 1.** Reflection absorption infrared spectroscopy (RAIRS) data for films of nitrous oxide deposited at different temperatures on a silica substrate. All spectra were recorded at the temperature of deposition. Only data for the  $\nu_{\text{NN}}$  peak are shown. Deposition at 21 K gives rise to two broad peaks, with maxima at  $2252 \text{ cm}^{-1}$  and  $2225 \text{ cm}^{-1}$  and these are assigned as the longitudinal optical (LO) and transverse optical (TO) phonon modes respectively. Thus the spectrum recorded at 21 K relates to the low temperature phase of nitrous oxide as described in the main body of text. Deposition at 55 K gives rise to a spectrum which relates to the high temperature phase of nitrous oxide, with the LO mode peak at  $2256 \text{ cm}^{-1}$  and the TO mode peak at  $2240 \text{ cm}^{-1}$ . Deposition at 40 K gives rise to a film whose spectrum contains elements related to both the low temperature and the high temperature phases. And deposition at 45 K gives rise to a film which predominantly shows peaks related to the high temperature phase. From this data set it can be concluded that the phase of nitrous oxide grown can be selected by deposition above or below 45 K. Deposition below 45 K gives the low temperature phase of nitrous oxide while deposition above 45 K gives the high temperature phase. This is consistent with the surface potential measurements presented in Fig. 4a in the main body of text and more precisely with the temperature regime in which it is necessary to introduce a change to the spontelectric model parameters. The RAIRS data that resulted from annealing experiments, Fig 2 in the main body of text, indicate that the phase change occurs upon annealing above 48 K.
